# Supplementary material for: Pulmonary veno-occlusive disease after respiratory syncytial virus infection in a post hematopoietic stem cell transplantation patient
Source: PubMed Central journal article supplement — Blood Cell Ther. 2023 Feb 10;6(1):1–4. doi: 10.31547/bct-2022-005 (PMC10266921; doi:10.31547/bct-2022-005), 2023-02-10
Supplement: 2432-7026-6-1-0001-s001.pdf [file 2432-7026-6-1-0001-s001.pdf]

**Figure S1.** Clinical course of the patient

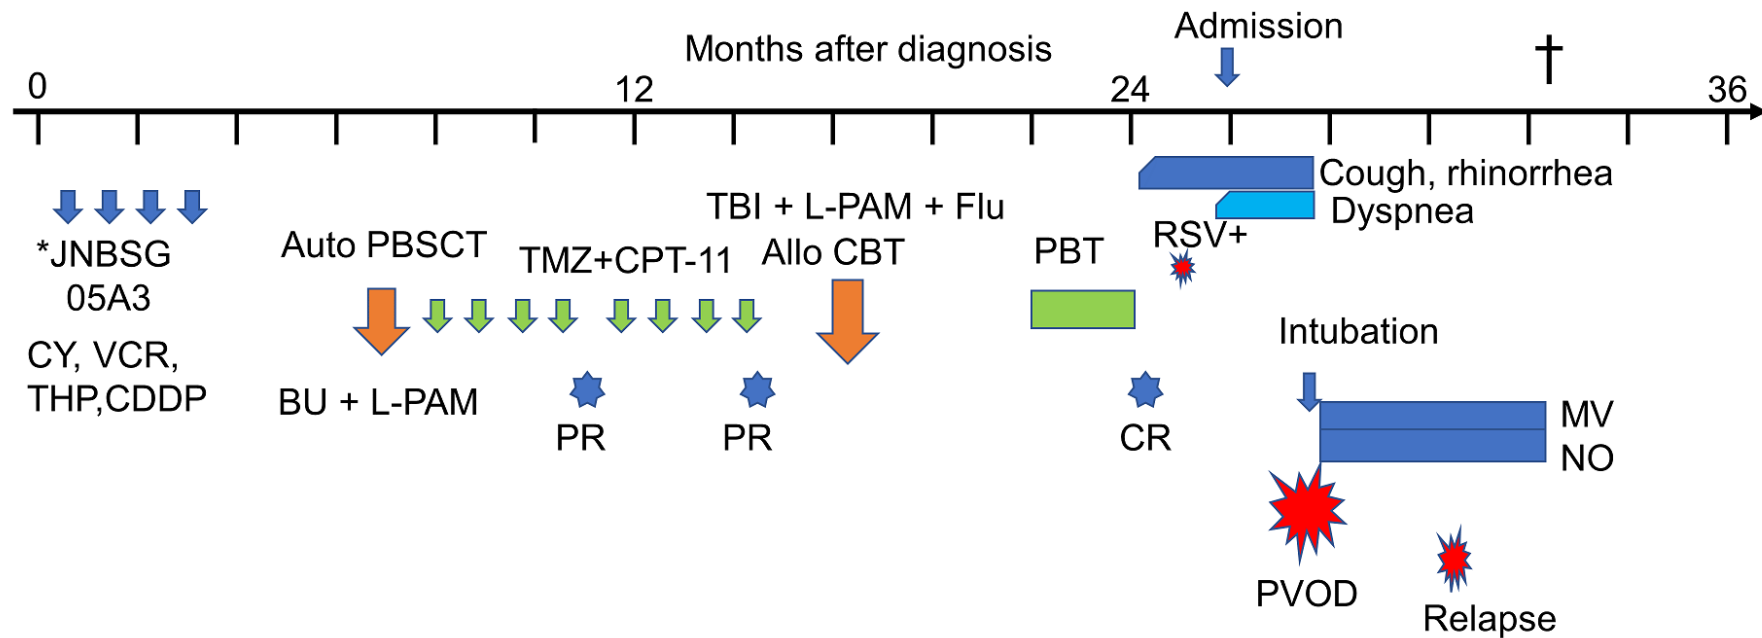

\*The patient was administered the “05A3” Japan Neuroblastoma Study Group regimen (Hishiki T et al., *Int J Clin Oncol.* 2018 Oct;23(5):965-973.). Abbreviations: Allo CBT, allogeneic cord blood transplantation; Auto PBSCT, autologous peripheral blood stem cell transplantation; BU, busulfan; CDDP, cisplatin; CPT-11, irinotecan; CR, complete remission; -Flu, fludarabine; **L-PAM, melphalan**; MV; mechanical ventilation; NO, nitric oxide; PBT, proton beam therapy; PR, partial response; PVOD, pulmonary veno-occlusive disease; RSV, respiratory syncytial virus; THP, pirarubicin; TBI, total body irradiation; TMZ temozolomide; VCR, vincristine
