# Supplementary material for: Pulmonary veno-occlusive disease after respiratory syncytial virus infection in a post hematopoietic stem cell transplantation patient
Source: PubMed Central journal article supplement — Blood Cell Ther. 2023 Feb 10;6(1):1–4. doi: 10.31547/bct-2022-005 (PMC10266921; doi:10.31547/bct-2022-005), 2023-02-10
Supplement: 2432-7026-6-1-0001-s004.pdf [file 2432-7026-6-1-0001-s004.pdf]

**Table S2. Clinical information regarding 1st and 2nd HSCT in the patient**

|                                     |                                                                                                                                                                          |
|-------------------------------------|--------------------------------------------------------------------------------------------------------------------------------------------------------------------------|
| First HSCT                          | Autologous PBSCT and BMT                                                                                                                                                 |
| Conditioning                        | BU + L-PAM                                                                                                                                                               |
| NCC                                 | PBSCT: $15.6 \times 10^8/\text{kg}$ , BMT: $0.8 \times 10^8/\text{kg}^*$                                                                                                 |
| CD34 <sup>+</sup>                   | PBSCT: $1.1 \times 10^6/\text{kg}$                                                                                                                                       |
| Day of neutrophil engraftment (day) | 13                                                                                                                                                                       |
| Second HSCT                         | Allogeneic CBT                                                                                                                                                           |
| Conditioning                        | Flu ( $150 \text{ mg}/\text{m}^2$ ) + L-PAM ( $140 \text{ mg}/\text{m}^2$ ) + TBI 12 Gy                                                                                  |
| Donor source                        | Unrelated donor                                                                                                                                                          |
| HLA matching                        | 5/8 (HLA-A, B, C mismatch)<br>Patient: A 02:06/33:03, B 15:18/44:03, C 08:01/14:03, DR:09:01:13:02<br>Donor: A 02:01/33:03, B 40:01/44:03, C 15:02/14:03, DR 09:01/13:02 |
| NCC                                 | $10.4 \times 10^7/\text{kg}$                                                                                                                                             |
| CD34 <sup>+</sup>                   | $2.90 \times 10^5/\text{kg}$                                                                                                                                             |
| Day of neutrophil engraftment (day) | 17                                                                                                                                                                       |
| GVHD prophylaxis                    | FK: $0.03 \text{ mg}/\text{kg}$ (from day -1) + MTX: $7 \text{ mg}/\text{m}^2$ (day +1), $5 \text{ mg}/\text{m}^2$ (day +3, +6)                                          |
| GVHD                                | Grade 3 (skin: stage 3, liver: stage 1, gut: stage 2)                                                                                                                    |

\*The patient was unable to obtain sufficient numbers of PBSCs even with 4 rounds of harvest. Therefore, bone marrow was harvested from the patient and added to PBSCs.

Abbreviations: BMT, bone marrow transplantation; BU, busulfan; CBT, cord blood transplantation; FK, tacrolimus; Flu, fludarabine; GVHD, graft-versus-host disease; HLA, human leukocyte antigen; HSCT, hematopoietic stem cell transplantation; L-PAM, melphalan; MTX, methotrexate; NCC, nuclear cell count; PBSCT, peripheral stem cell transplantation; TBI, total body irradiation
